# Supplementary material for: Construction of defective cobalt oxide for methane combustion by oxygen vacancy engineering
Source: Royal Society of Chemistry journal article supplement (doi:10.1039/d1nj01296g), 2021-01-01
Supplement: d1nj01296g1.pdf [file d1nj01296g1.pdf]

## Construction of defective cobalt oxide for methane combustion by oxygen vacancy engineering

Xin Zhang<sup>a,1</sup>, Xin Jin<sup>a,1</sup>, Liurui Bao<sup>a</sup>, Mingchao Zhang<sup>a</sup>, Ruiming Song<sup>a</sup>, Wei Yu<sup>a</sup>, Hongbo Zhang<sup>b</sup>,  
Wei Huang<sup>c</sup>, Weiguang Su<sup>d,\*</sup>, Xingyun Li<sup>a,\*</sup>,

<sup>a</sup>Institute of Materials for Energy and Environment, College of Materials Science and Engineering, Qingdao University, Qingdao, 266071, China

<sup>b</sup>Key Laboratory of Advanced Energy Materials Chemistry (Ministry of Education), College of Chemistry, Nankai University, Tianjin 300071, China.

<sup>c</sup>Key Laboratory of Coal Science and Technology, Education Ministry and Shanxi Province, Taiyuan University of Technology

<sup>d</sup>State Key Laboratory of High-efficiency Utilization of Coal and Green Chemical Engineering, Ningxia University, Ningxia, Yinchuan, 750021, China

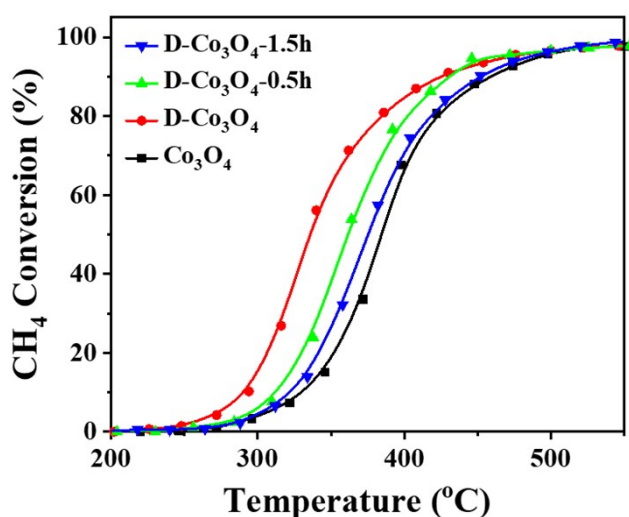

**Fig. S1** Catalytic performance of D-Co<sub>3</sub>O<sub>4</sub> with different milling time. Reactant mixer: 2% CH<sub>4</sub>, 20% O<sub>2</sub>, Ar as balance gas. WHSV=33,000 mL g<sup>-1</sup> h<sup>-1</sup>.

<sup>1</sup>These authors contributed equally to this work.

\*Corresponding authors:

E-mail: [xingyun\\_2008@sina.cn](mailto:xingyun_2008@sina.cn) (X. Li)

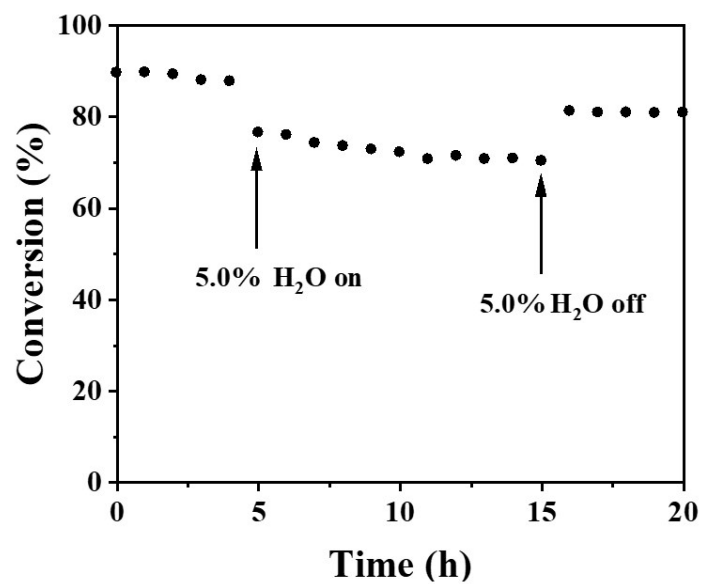

**Fig. S2** Stability test of G-Co<sub>3</sub>O<sub>4</sub>. Reactant mixer: 2% CH<sub>4</sub>, 20% O<sub>2</sub>, Ar as balance gas. WHSV=33,000 mL g<sup>-1</sup> h<sup>-1</sup>.

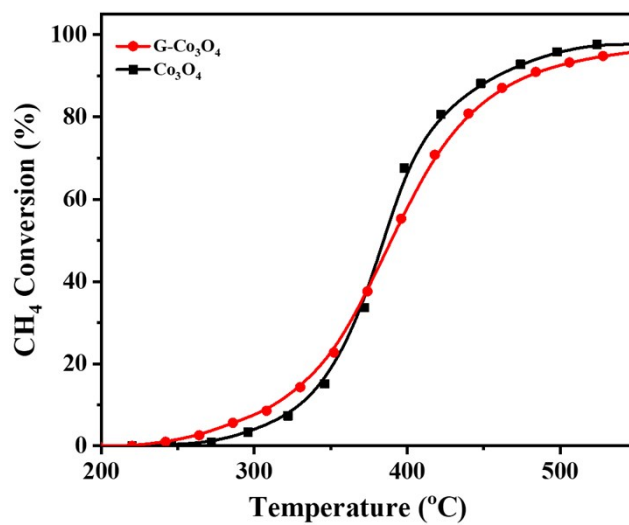

**Fig. S3** Catalytic performance over Co<sub>3</sub>O<sub>4</sub> and G-Co<sub>3</sub>O<sub>4</sub>. Reactant mixer: 2% CH<sub>4</sub>, 20% O<sub>2</sub>, Ar as balance gas. WHSV=33,000 mL g<sup>-1</sup> h<sup>-1</sup>.

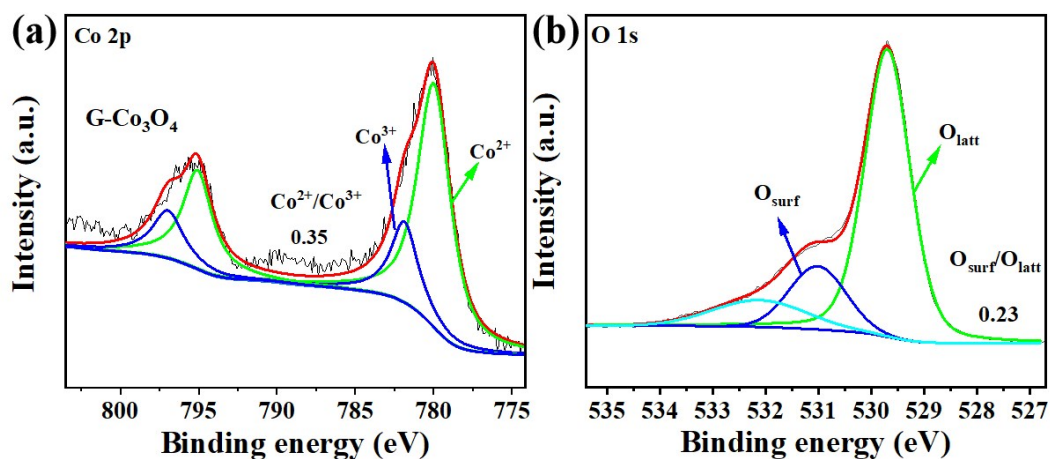

Fig. S4 Deconvolution of (a) Co 2p (b) O 1s XPS spectra of G-Co<sub>3</sub>O<sub>4</sub>.

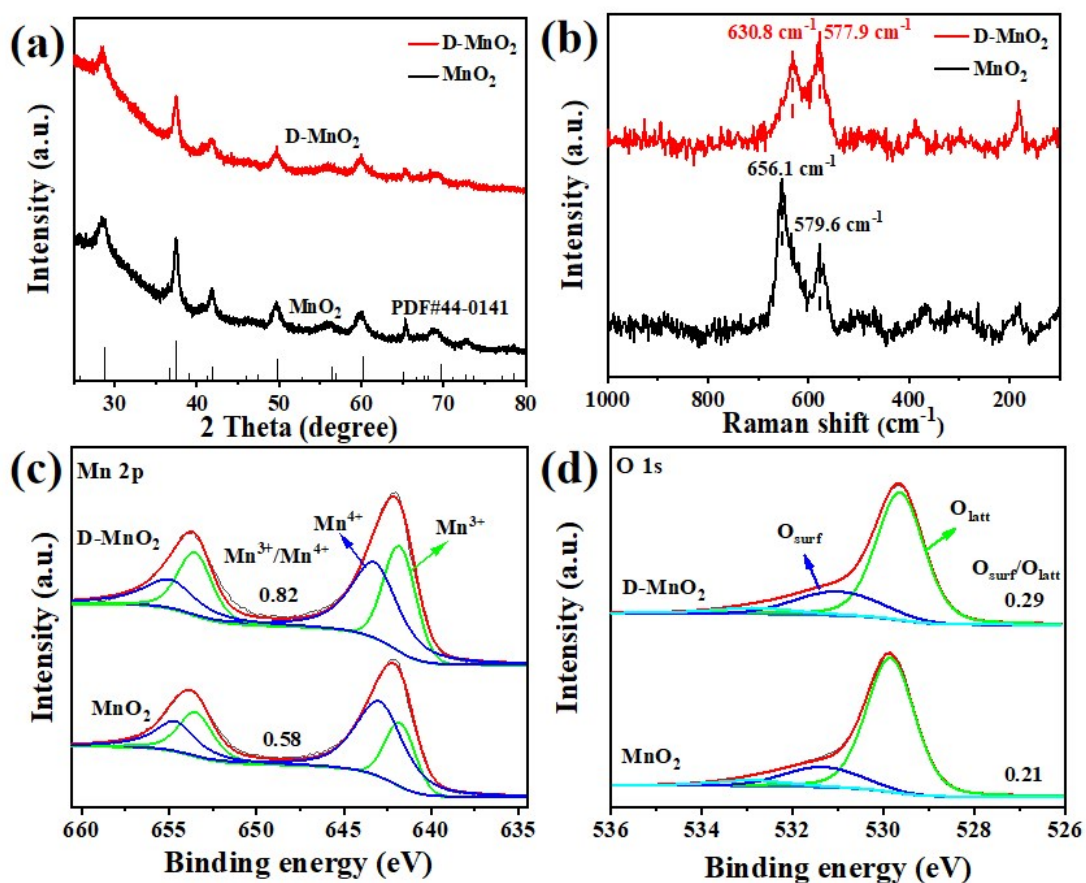

Fig. S5 (a) XRD, (b) Raman, deconvolution of (c) Mn 2p and (d) O 1s XPS spectra of D-MnO<sub>2</sub> and MnO<sub>2</sub>.
